# Supplementary material
Source: publisher site journal article supplement (https://www.degruyterbrill.com/publication/isbn/9783050088211/downloadAsset/9783050088211_Buchinformation.pdf)
Supplement: Supplementary file 1 [file 9783050088211_Buchinformation.pdf]

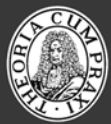

# Akademie Verlag

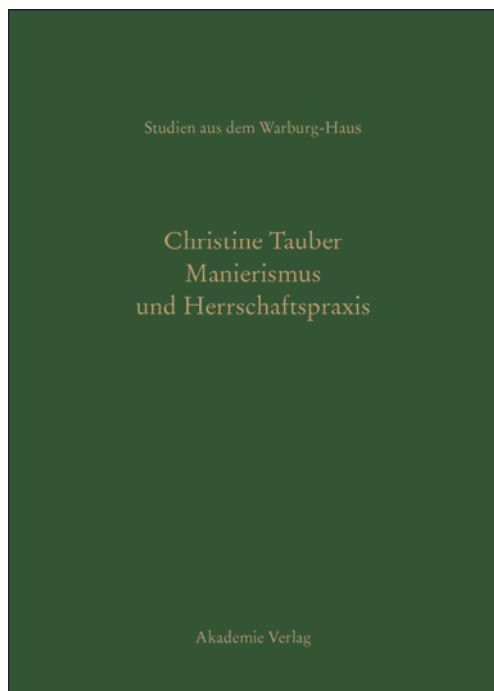

Christine Tauber

## Manierismus als Herrschaftspraxis

Die Kunst der Politik und die Kunstpolitik  
am Hof von François I<sup>er</sup>

*Studien aus dem Warburg-Haus, Band 10*

2009. V, 452 Seiten, 87 s/w- und 50 Farbbabb.

170 x 240 mm, Festeinband, € 79,80

ISBN 978-3-05-004565-8

Als dezidierter Beitrag zur Kunst- und Kulturgeschichte des Politischen fragt das Buch nach der Inanspruchnahme von Kunst zur Herrschaftsrepräsentation, nach Ritualen und Zeichensystemen der Macht am französischen Königshof in der ersten Hälfte des 16. Jahrhunderts. Kunstförderung und Herrschaftshandeln werden hierbei als strukturhomologe Strategien eines (früh)modernen Politikmodells analysiert. Die Entscheidung für einen spezifisch „modernen“ Kunststil – den italienischen Manierismus – wurde für den französischen König François I<sup>er</sup> zum Politikum: Er schuf sich in Fontainebleau ein Reich mit künstlerischen Mitteln, über das er jederzeit im Sinne der Deutungshoheit als Herrschaftsakt verfügen konnte.

Kunstwerke von Rosso Fiorentino, Benvenuto Cellini und Primaticcio, die in ihrer Skurrilität und Vielschichtigkeit die sinnliche Ausgangsevidenz für eine lohnende Betrachtung bieten; historische Szenen auf höchster machtpolitischer Ebene, die sich in ihrer kommunikativen und zeremoniellen Funktion erst dem ethnographisch-verfremdenden Blick erschließen; schließlich ein höfisches Milieu, in dem Intellekt, Macht, Witz, Hermetik und Erotik eine unauflösliche Verbindung eingehen: Was könnten reizvollere Quellen für die Erschließung der Spezifika von Manierismus und Herrschaftspraxis am französischen Hof im Kontext des europäischen Mächtesystems nach 1500 sein?
